# Supplementary material for: The combination of IFNα2b/5-FU inhibits proliferation and cell cycle of tumor cells in treating Ocular Surface Squamous Neoplasia
Source: Research Square preprint supplement (doi:10.21203/rs.3.rs-4157100/v1), 2024-04-15

# **The combination of IFN $\alpha$ 2b/5-FU inhibits proliferation and cell cycle of tumor cells in treating Ocular Surface Squamous Neoplasia**

Zong-Bo Wu<sup>1‡</sup>, Gong-Yue Wang<sup>2‡</sup>, Bei Wang<sup>2</sup>, Xi Peng<sup>2</sup>, Jia-Song Wang<sup>2</sup>, Ming-Chang Zhang<sup>2</sup>, Geng Wen<sup>2\*</sup>, Hua-Tao Xie<sup>2\*</sup>

<sup>1</sup>Department of Ophthalmology, Jingshan Union Hospital, Union Hospital, Huazhong University of Science and Technology, Jingshan 431800, China.

<sup>2</sup>Department of Ophthalmology, Union Hospital, Tongji Medical College, Huazhong University of Science and Technology, Wuhan 430022, China.

<sup>‡</sup>These authors contributed equally to this work.

\*Correspondence to Hua-Tao Xie, e-mail: [huataoxie@hust.edu.cn](mailto:huataoxie@hust.edu.cn) or Geng Wen, e-mail: [gengwen@hust.edu.cn](mailto:gengwen@hust.edu.cn)

**Figure S1.** The original western blot images. The original blot area used in the main image is indicated by a red box. The Western blot images corresponding to Figure 4a.

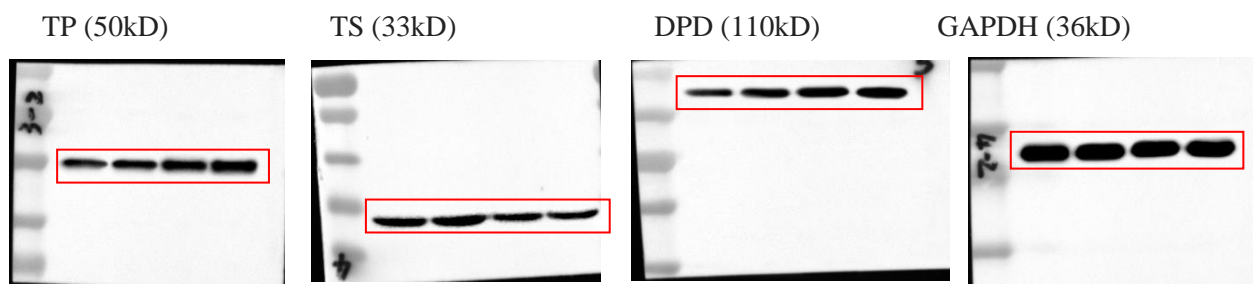

Supplement: Supplementary file 1 [file 47074c2757a87feaa48a9b65.pdf]
